# Supplementary material for: Valorisation of the industrial hemp residue from essential oil production by recovery of cannabidiol and chemo-enzymatic conversion to cannabielsoin
Source: Royal Society of Chemistry journal article supplement (doi:10.1039/d4gc00415a), 2024-01-01

# **Valorisation of industrial hemp residue from essential oil production by recovery of cannabidiol and chemo-enzymatic conversion to cannabielsoin**

Daniele Fiorito,<sup>#</sup> Davide Tessaro,<sup>#</sup> Fabio Sangalli, Celeste Nobbio,  
Mario Nebuloni, Matteo Vezzini, Elisabetta Brenna, Fabio Parmeggiani\*

Department of Chemistry, Materials and Chemical Engineering "G. Natta",  
Politecnico di Milano, P.za Leonardo da Vinci, 20133 Milano, Italy.

E-mail: [fabio.parmeggiani@polimi.it](mailto:fabio.parmeggiani@polimi.it)

<sup>#</sup> Equal contribution

**Electronic supplementary information (ESI)**

**Supplementary figures and tables**

**Figure S1.**  $^1\text{H}$  NMR spectra of commercial bioethanol.

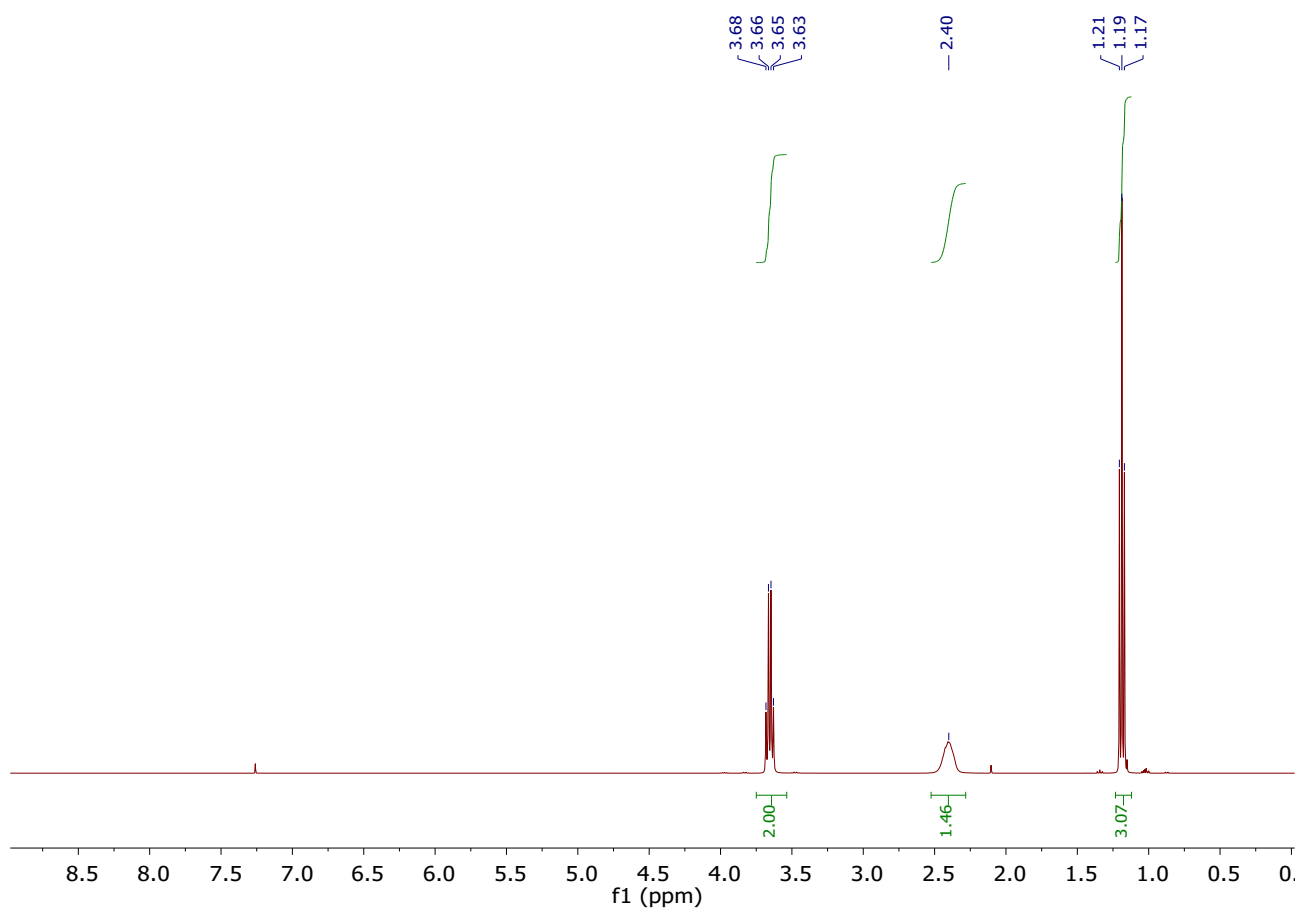

**Figure S2.** Comparison of  $^1\text{H}$  NMR spectra of different samples of CBD recovered from waste by chromatography (a,b) or by vacuum distillation (c,d).

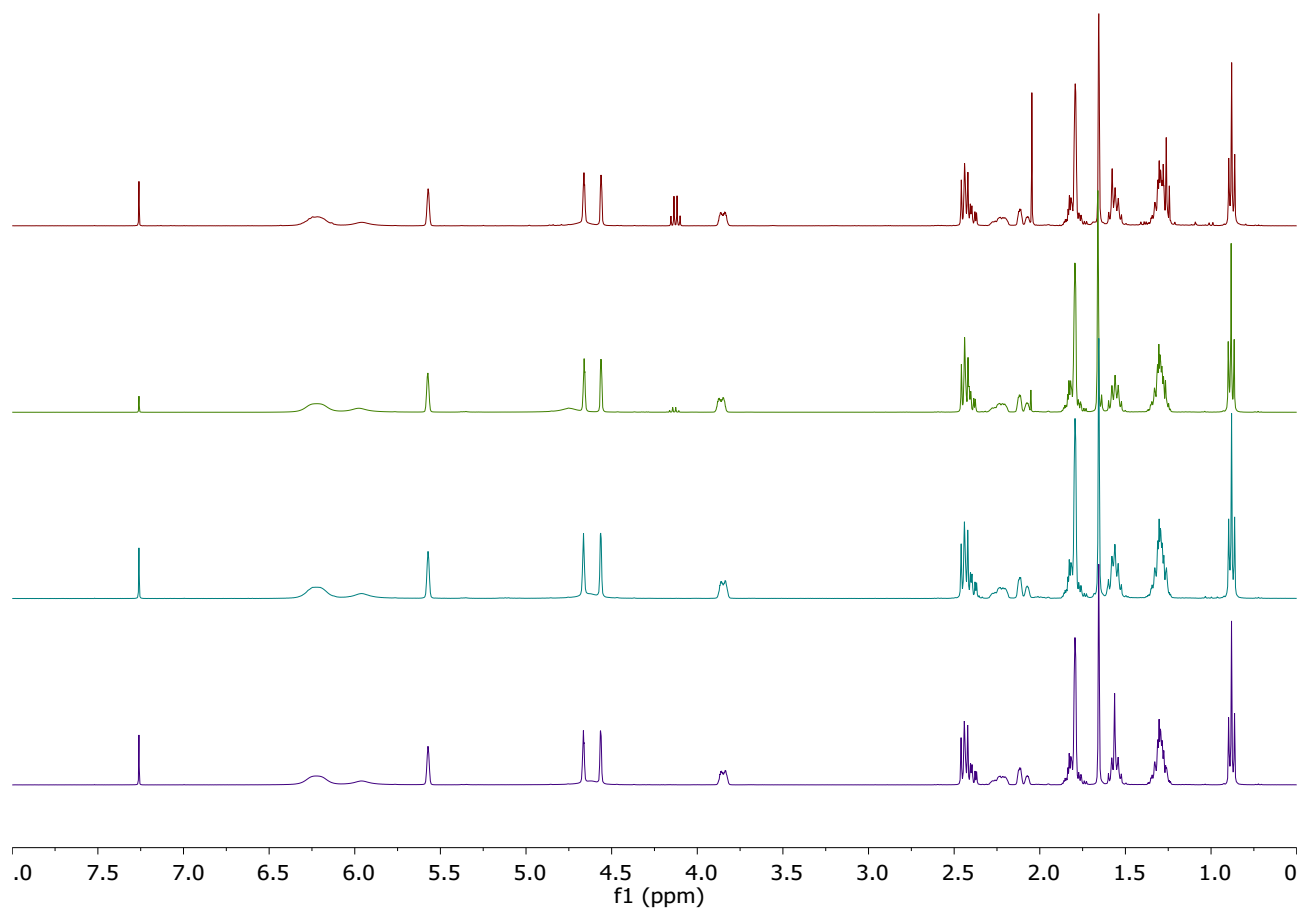

**Figure S3.** Representative GC-MS trace for the chemo-enzymatic one-step synthesis of CBE from CBD.

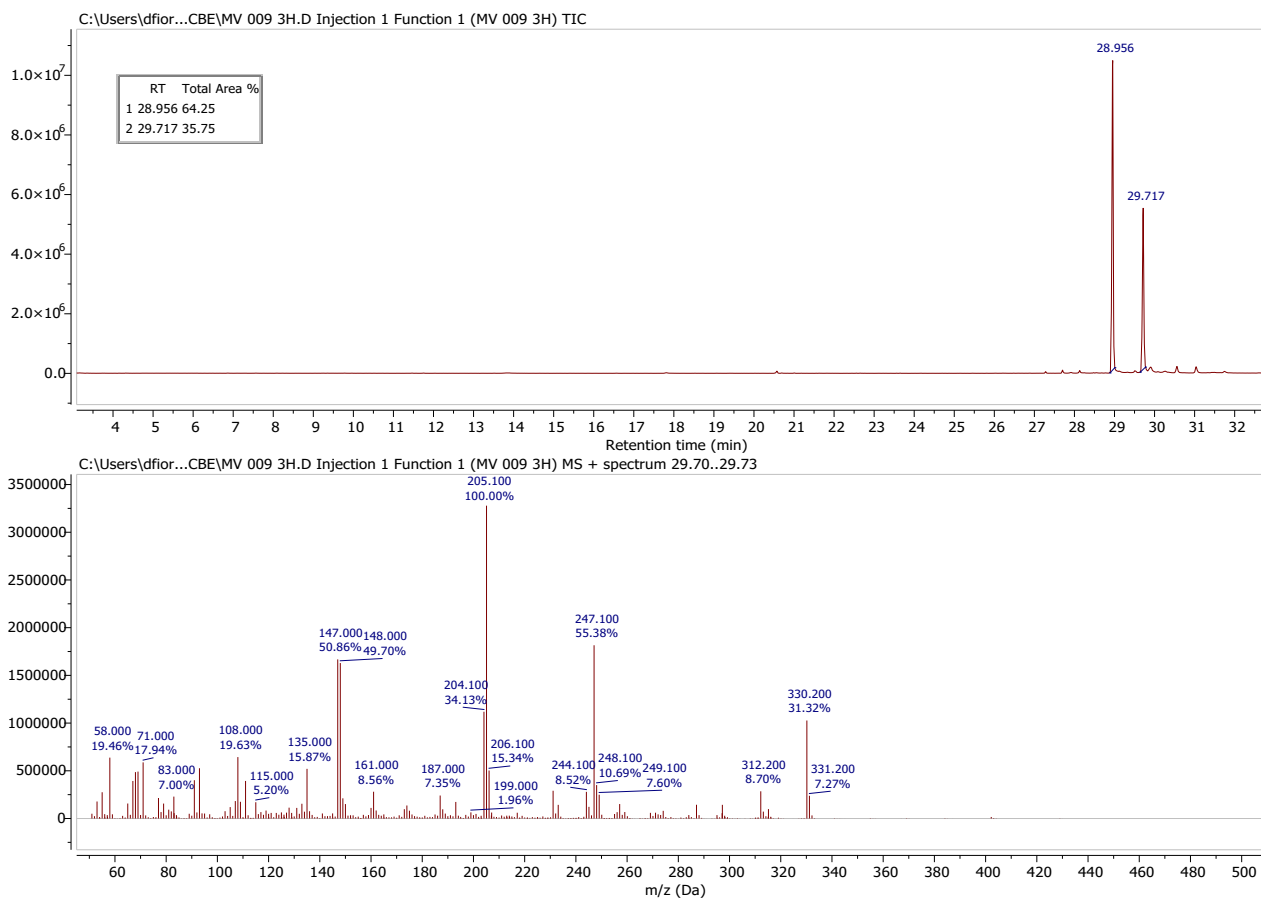

**Table S1.** Screening of the conditions for lipase-mediated chemo-enzymatic oxidation of CBD.<sup>a</sup>

| Entry | T<br>[°C] | Enz. loading<br>[% w/w] | H <sub>2</sub> O <sub>2</sub><br>[equiv.] | t<br>[h] <sup>b</sup> | Conv. to CBE<br>[%] <sup>c</sup> |
|-------|-----------|-------------------------|-------------------------------------------|-----------------------|----------------------------------|
| 1a    | 4         | 5                       | 1.1                                       | 2                     | 9                                |
| 1b    |           |                         |                                           | 4                     | 29                               |
| 1c    |           |                         |                                           | 6                     | 35                               |
| 2a    | 4         | 10                      | 1.1                                       | 2                     | 18                               |
| 2b    |           |                         |                                           | 4                     | 22                               |
| 2c    |           |                         |                                           | 6                     | 31                               |
| 3a    | 30        | 5                       | 1.1                                       | 2                     | 34                               |
| 3b    |           |                         |                                           | 4                     | <b>53</b>                        |
| 3c    |           |                         |                                           | 6                     | 51                               |
| 4a    | 30        | 10                      | 1.1                                       | 2                     | 26                               |
| 4b    |           |                         |                                           | 4                     | 38                               |
| 4c    |           |                         |                                           | 6                     | 31                               |
| 5a    | 4         | 5                       | 4.0                                       | 2                     | 15                               |
| 5b    |           |                         |                                           | 4                     | 38                               |
| 5c    |           |                         |                                           | 6                     | 39                               |
| 6a    | 4         | 10                      | 4.0                                       | 2                     | 38                               |
| 6b    |           |                         |                                           | 4                     | 47                               |
| 6c    |           |                         |                                           | 6                     | 43                               |
| 7a    | 30        | 5                       | 4.0                                       | 2                     | 43                               |
| 7b    |           |                         |                                           | 4                     | 47                               |
| 7c    |           |                         |                                           | 6                     | 17                               |
| 8a    | 30        | 10                      | 4.0                                       | 2                     | 33                               |
| 8b    |           |                         |                                           | 4                     | 41                               |
| 8c    |           |                         |                                           | 6                     | 28                               |

<sup>a</sup> Conditions: 50 mg CBD, 15 mL EtOAc (working conc. 10 mM), 1.1-4.0 equiv. H<sub>2</sub>O<sub>2</sub> (3.5% w/w aq. sol.), 5-10% w/w immobilised Novozym<sup>®</sup> 435, 4-30°C, 2-24 h.

<sup>b</sup> Datapoints for longer reaction times (18-24 h) are not shown due to extremely low or no CBE contents in all cases, as a consequence of oxidative decomposition.

<sup>c</sup> Determined by quantification of CBE formed (by GC-MS, using *n*-decane as internal standard). Note: direct calculation of the conversion by comparison of CBD and CBE peaks is unreliable due to the formation of other polar products not detected by GC-MS.

## Details of the calculations of simplified E-factor (sEF) for the processes considered

The simplified E-factor values have been calculated according to Roschangar *et al.*, *Green Chem.* **2015**, *17*, 752-768. This metric considers all waste originated from reagents, co-substrates and catalysts, and does not take into account water and solvents and recyclable materials. For literature procedures, the data has been collected from the descriptions of the experimental procedures available. Due to its definition, this metric should only be used for the purpose of comparison, and not to draw conclusions on the actual amounts of waste produced.

| Chemical via silylated CBD (3 steps) |       |
|--------------------------------------|-------|
| CBD                                  | 37    |
| BSTFA                                | 200   |
| mCPBA                                | 30    |
| Reagents                             | 267   |
| Product                              | 23,9  |
| Waste                                | 243,1 |
| sEF                                  | 10,17 |

| Chemical via CBD diacetate (3 steps) |       |          |       |           |      |
|--------------------------------------|-------|----------|-------|-----------|------|
| Step 1                               |       | Step 2   |       | Step3     |      |
| CBD                                  | 3,27  | CBD-diAc | 2,66  | CBDO-diAc | 2,57 |
| Ac2O                                 | 3,9   | NaHCO3   | 0,617 | K2CO3     | 4,28 |
| Et3N                                 | 5,8   | mCPBA    | 1,54  |           |      |
| DMAP                                 | 0,25  |          |       |           |      |
| Reagents                             | 13,22 | Reagents | 4,817 | Reagents  | 6,85 |
| Product                              | 4,05  | Product  | 2,02  | Product   | 1,54 |
| Waste                                | 9,17  | Waste    | 2,797 | Waste     | 5,31 |
| sEF                                  | 2,26  | sEF      | 1,38  | sEF       | 3,45 |
|                                      |       |          |       | sEF tot   | 7,10 |

| Chemo-enzymatic direct (1 step) |      |
|---------------------------------|------|
| CBD                             | 200  |
| H2O2                            | 12   |
| Lipase                          | 5    |
| Reagents                        | 217  |
| Product                         | 65   |
| Waste                           | 152  |
| sEF                             | 2,34 |

| Chemo-enzymatic via CBD diacetate (3 steps) |      |          |      |           |      |
|---------------------------------------------|------|----------|------|-----------|------|
| Step 1                                      |      | Step 2   |      | Step 3    |      |
| CBD                                         | 300  | CBD-diAc | 240  | CBDO-diAc | 140  |
| Ac2O                                        | 340  | Lipase   | 12   | K2CO3     | 234  |
| Et3N                                        | 500  | H2O2     | 24   |           |      |
| DMAP                                        | 22   |          |      |           |      |
| Reagents                                    | 1162 | Reagents | 276  | Reagents  | 374  |
| Product                                     | 290  | Product  | 174  | Product   | 101  |
| Waste                                       | 872  | Waste    | 102  | Waste     | 273  |
| sEF                                         | 3,01 | sEF      | 0,59 | sEF       | 2,70 |
|                                             |      |          |      | sEF tot   | 6,30 |

### NMR characterisation of CBD

MV20 completa.1.fid  
gruppo EB

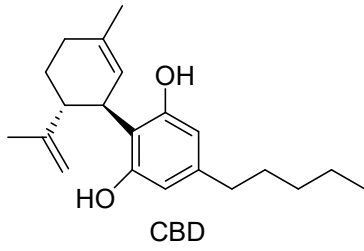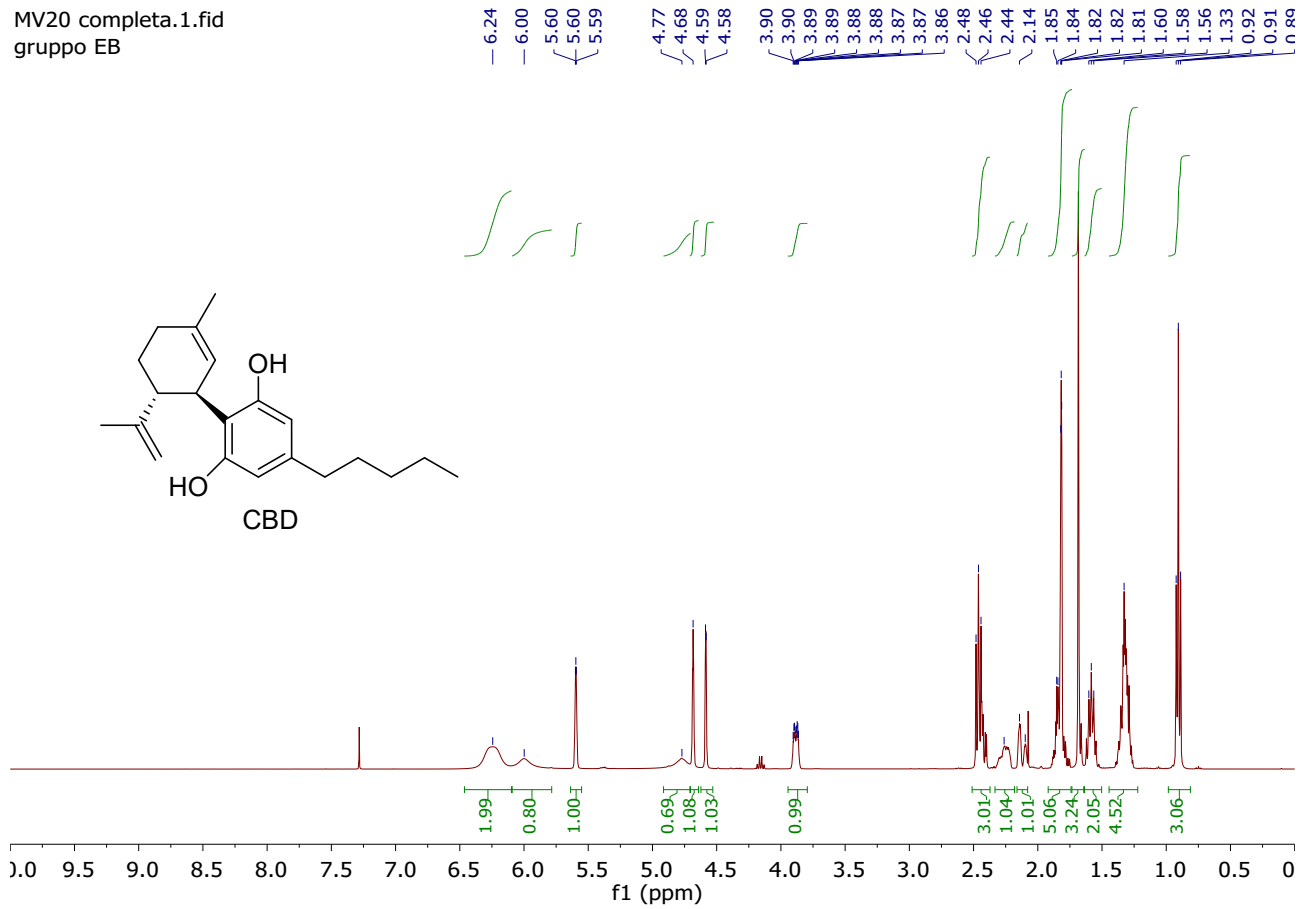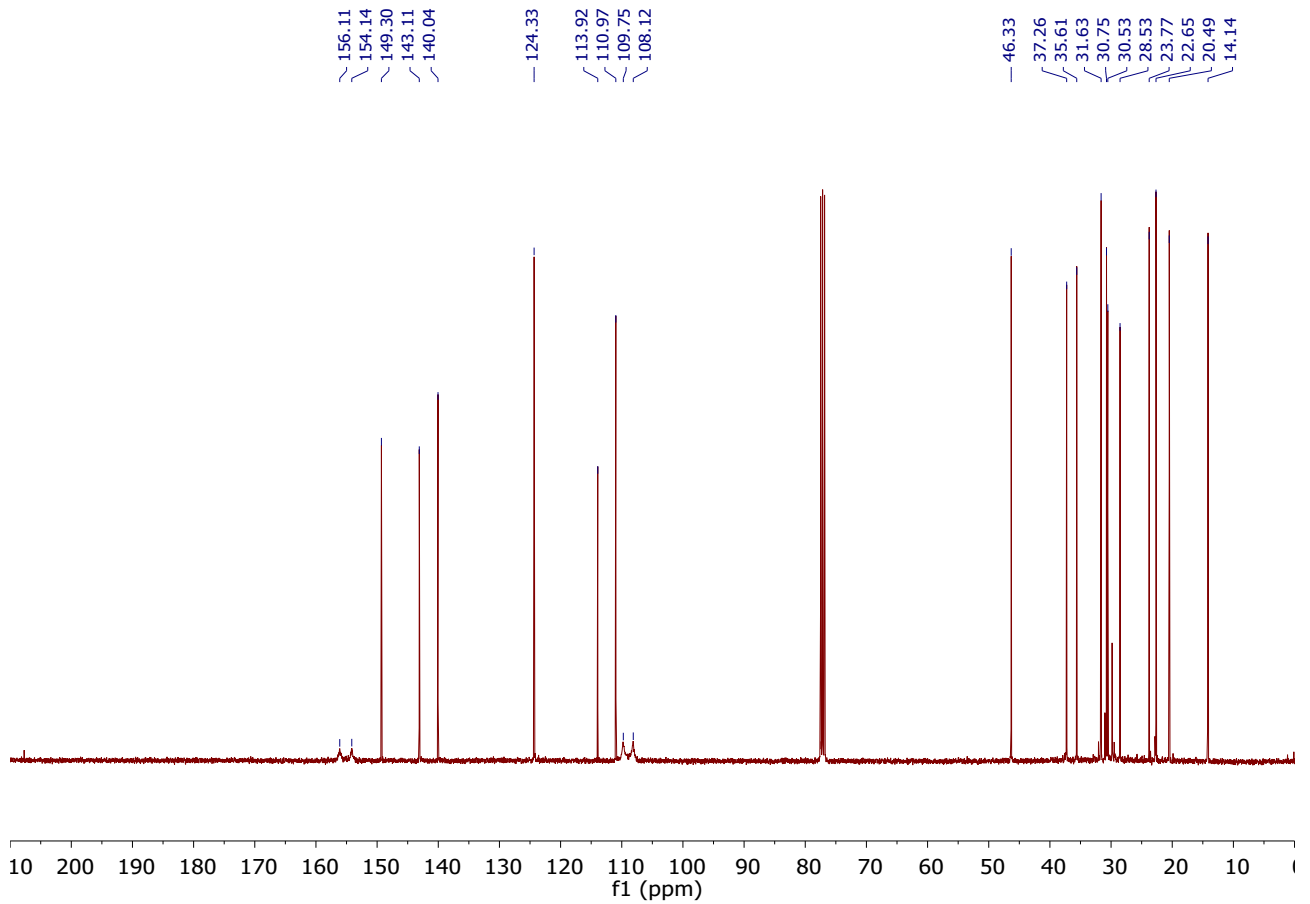

MV20 completa.2.fid  
gruppo EB

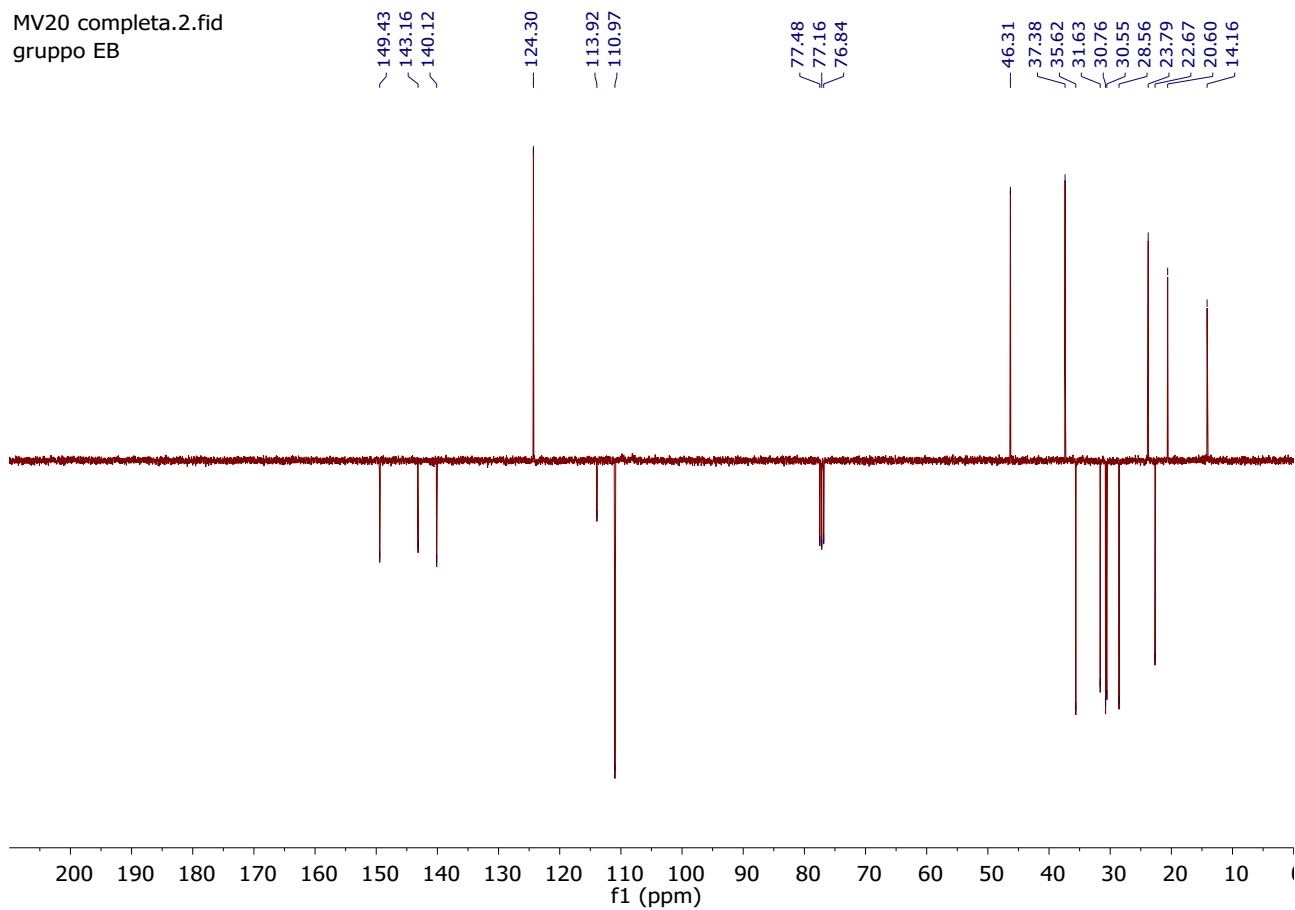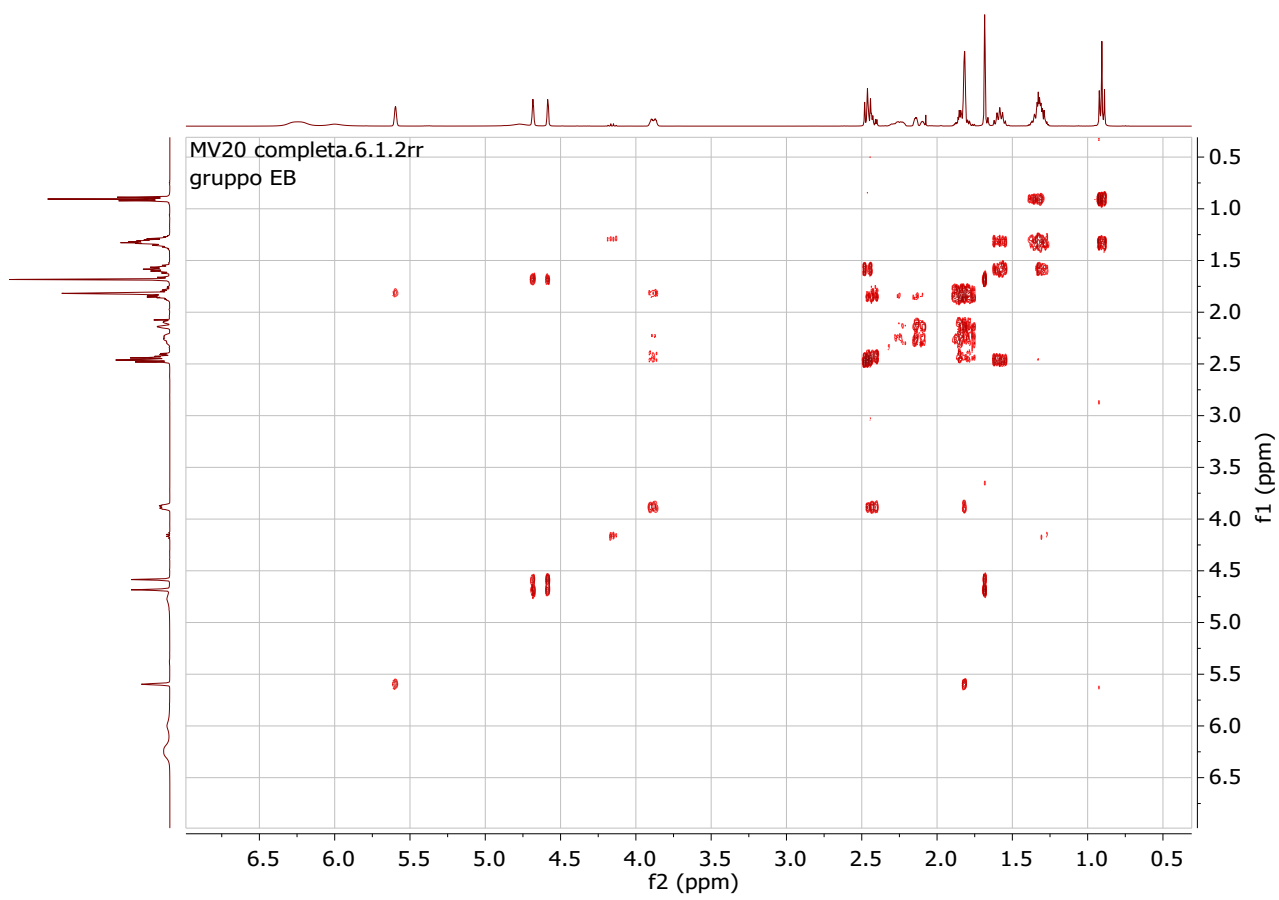



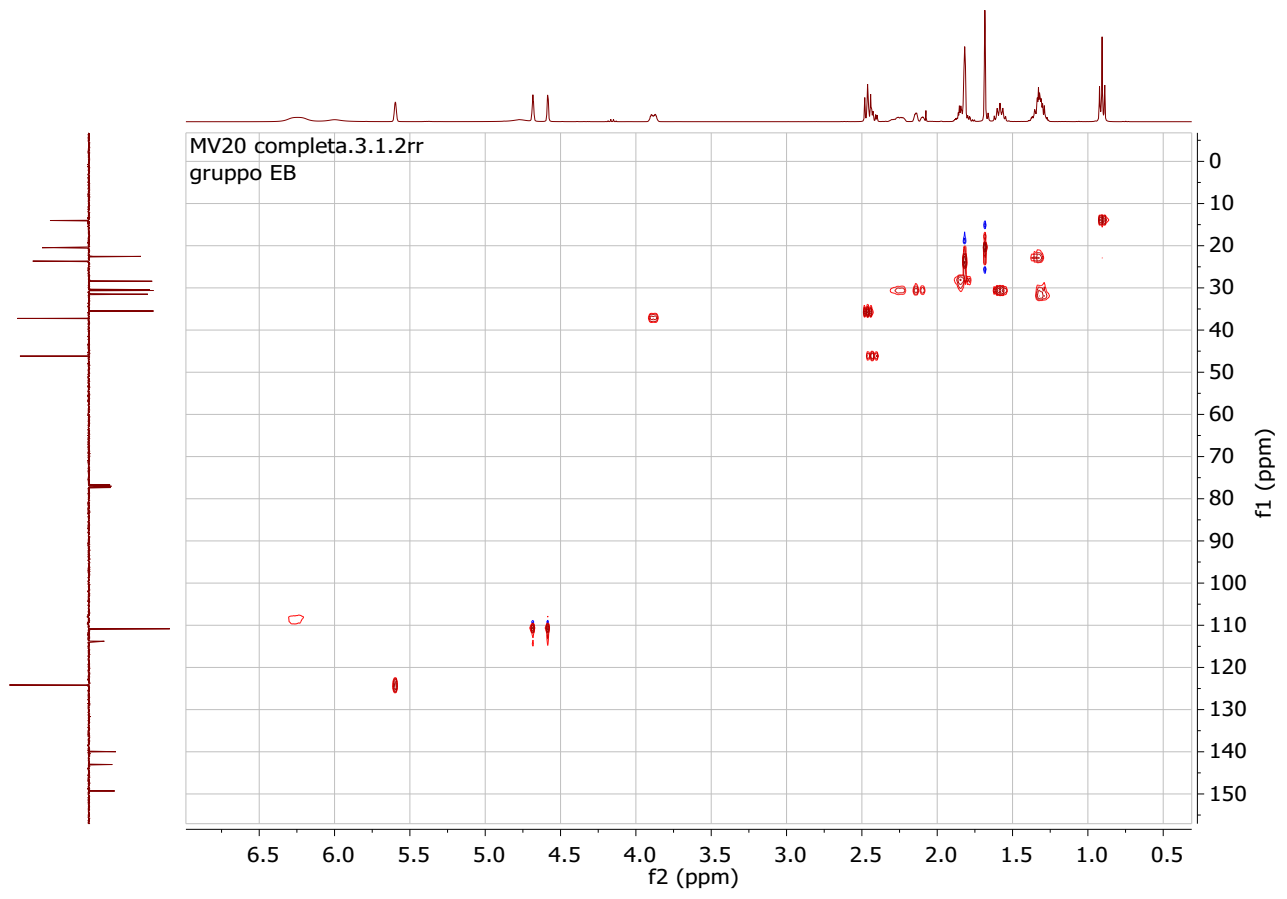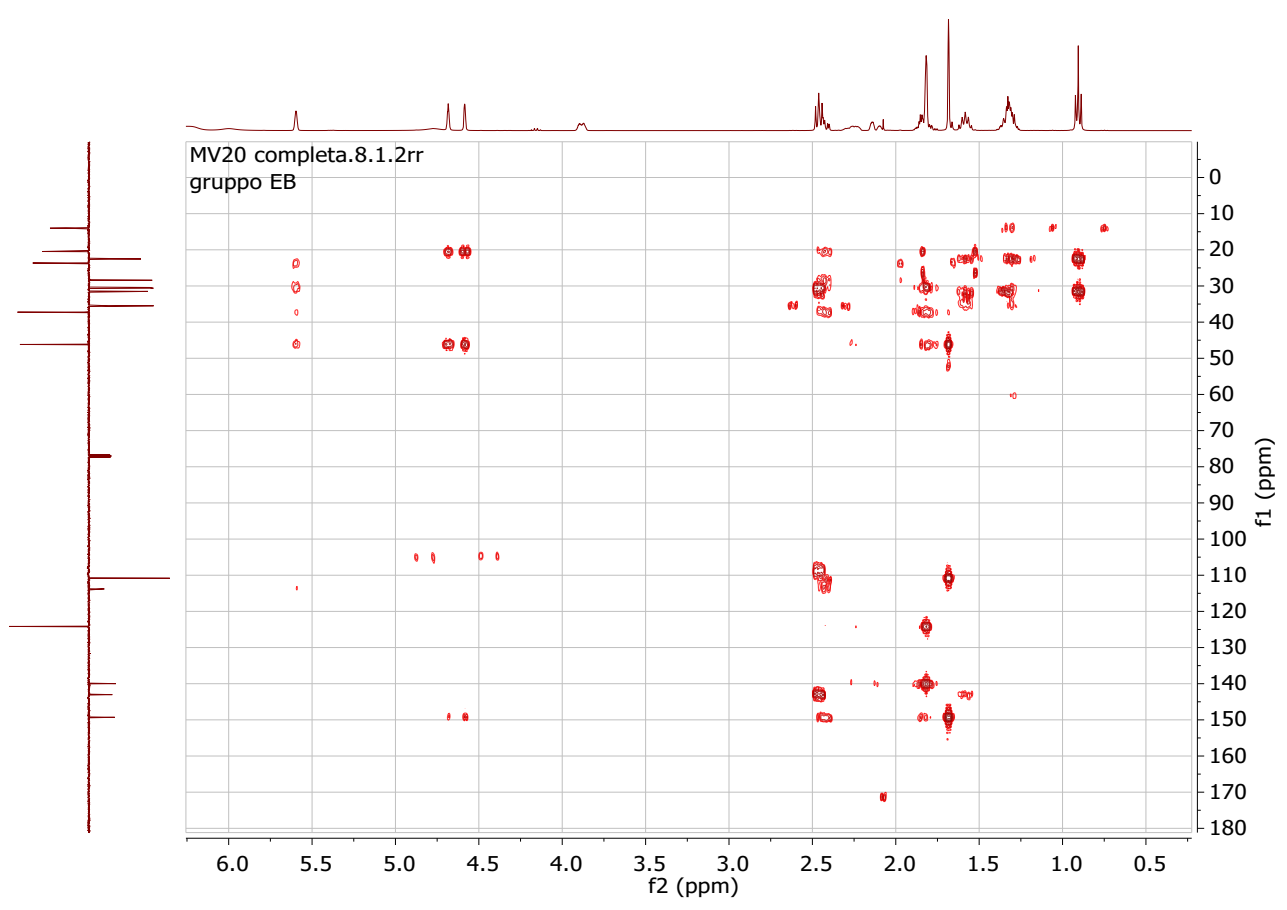

### NMR characterisation of CBE (chemo-enzymatic one-step)

DFFPCBD-FC.1.fid  
gruppo EB

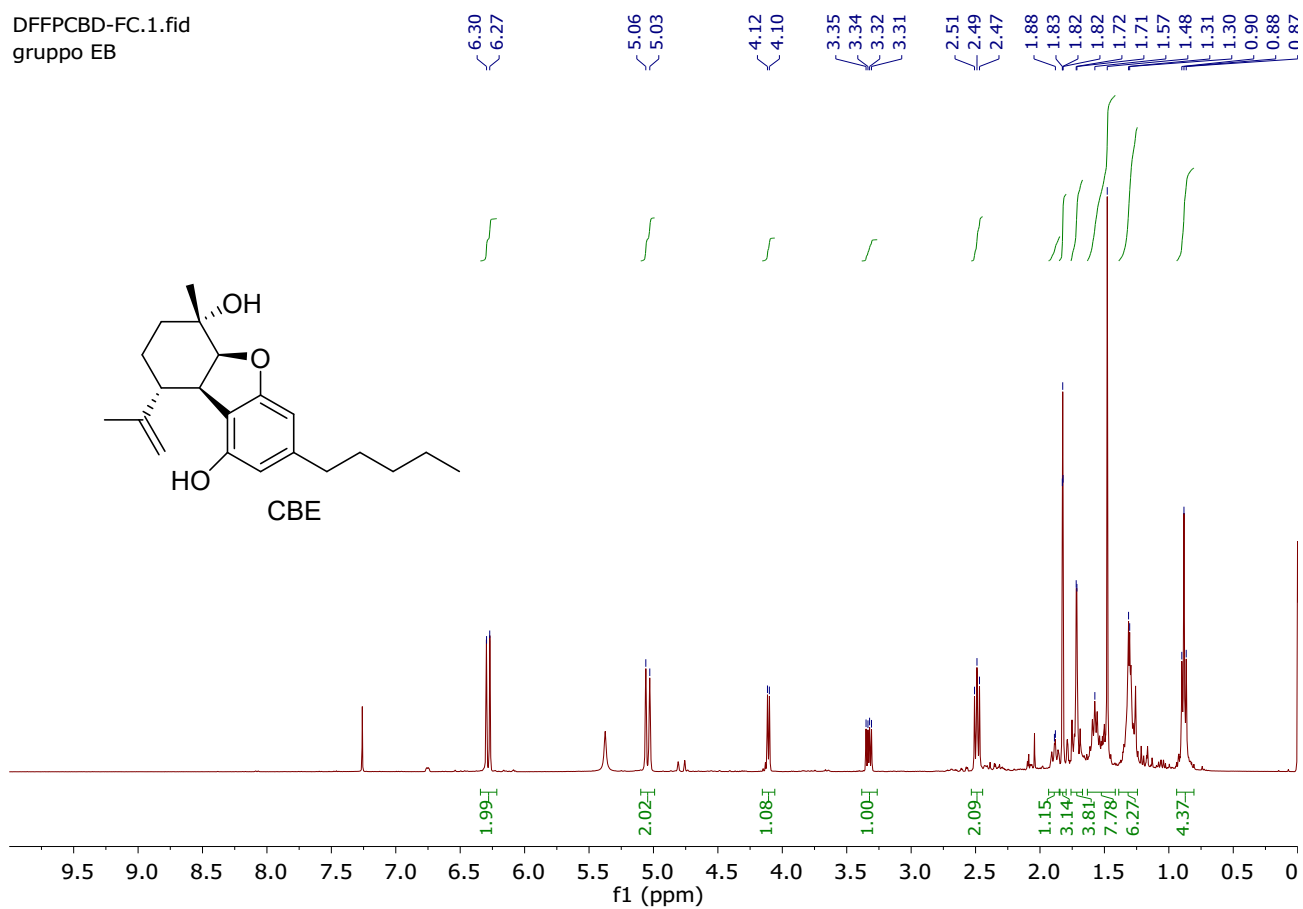

DFFPCBD-FC.2.fid  
gruppo EB

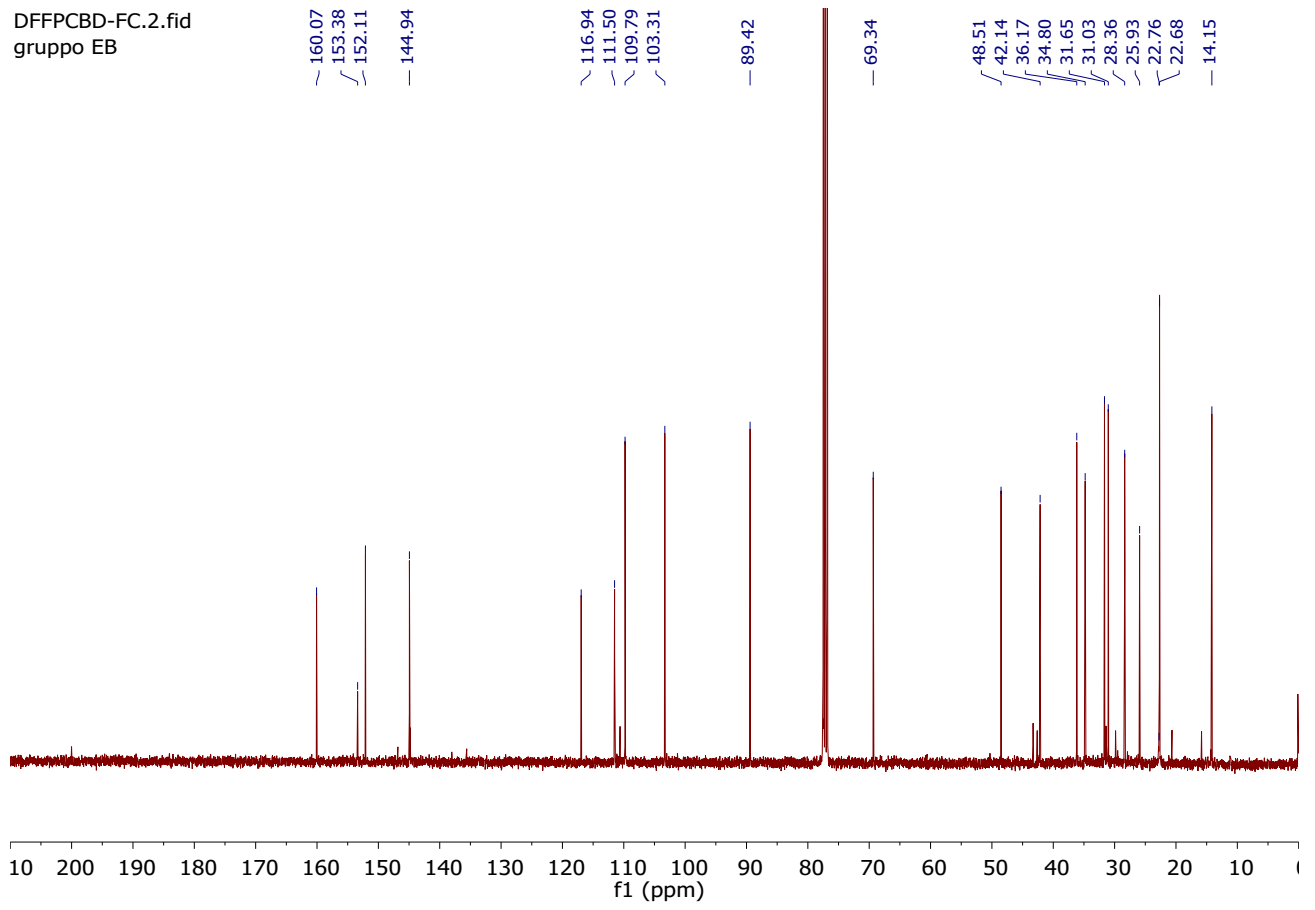

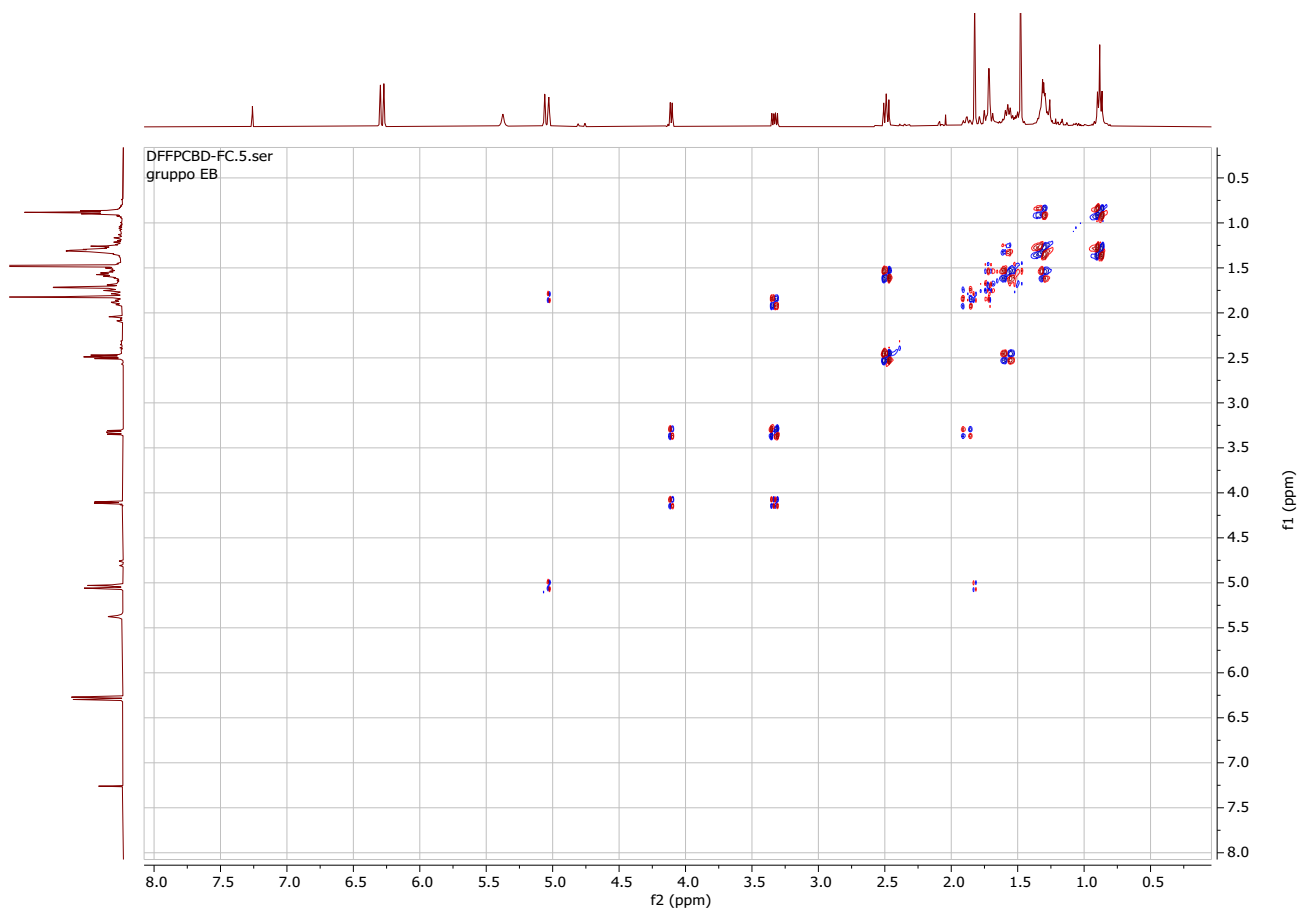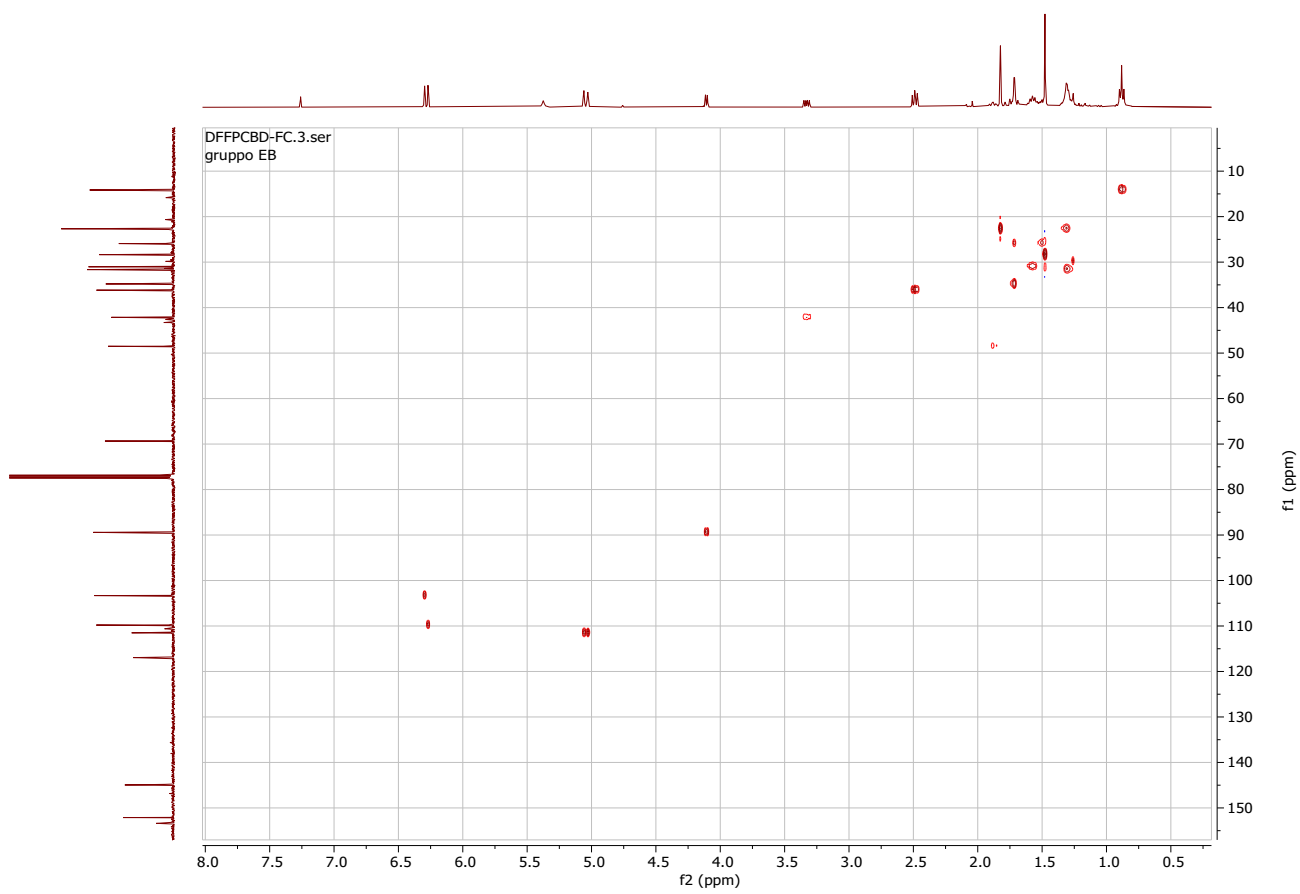

### NMR characterisation of CBE (chemo-enzymatic via CBD diacetate)

DF113FC.1.fid

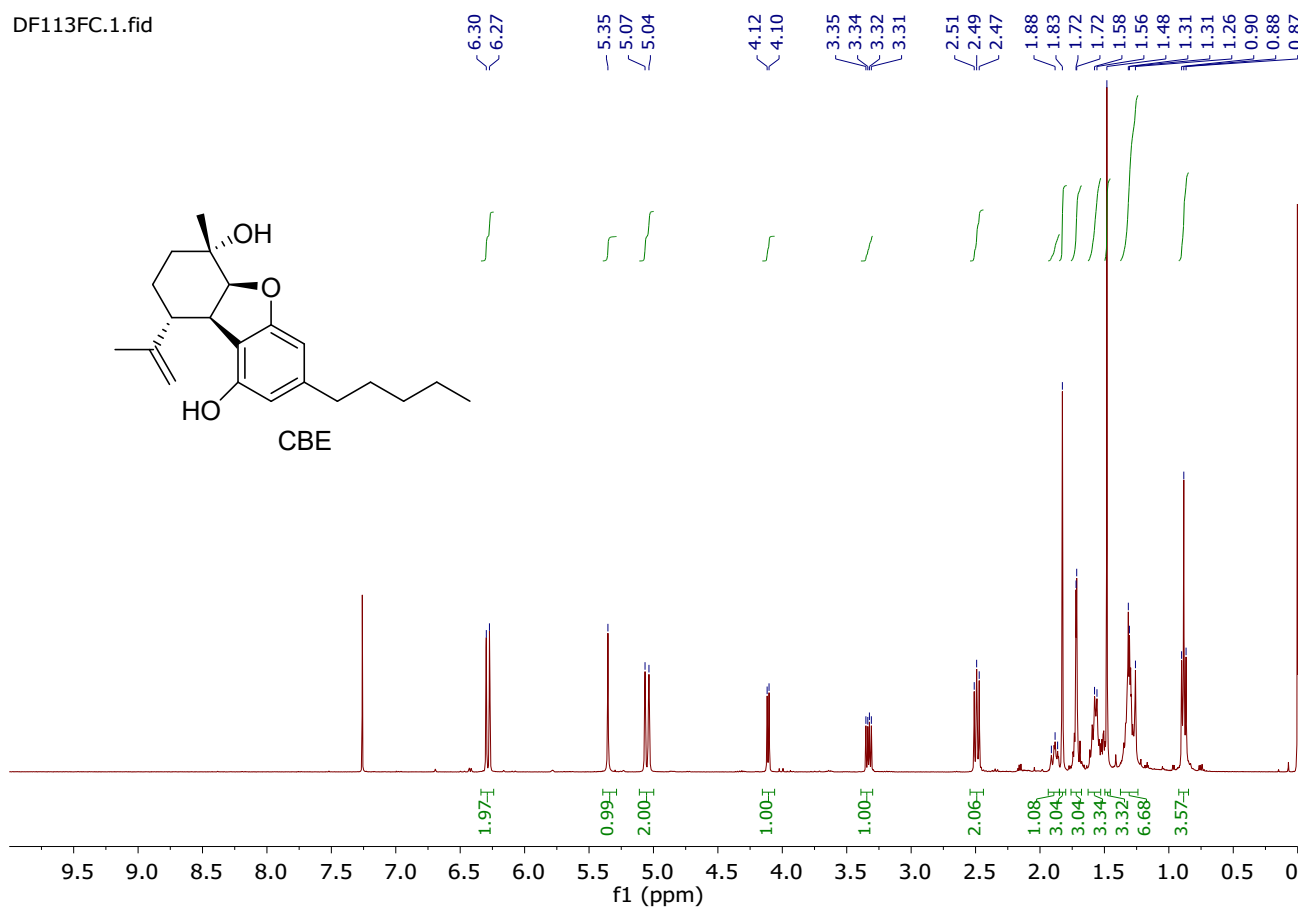

DF113FC.2.fid

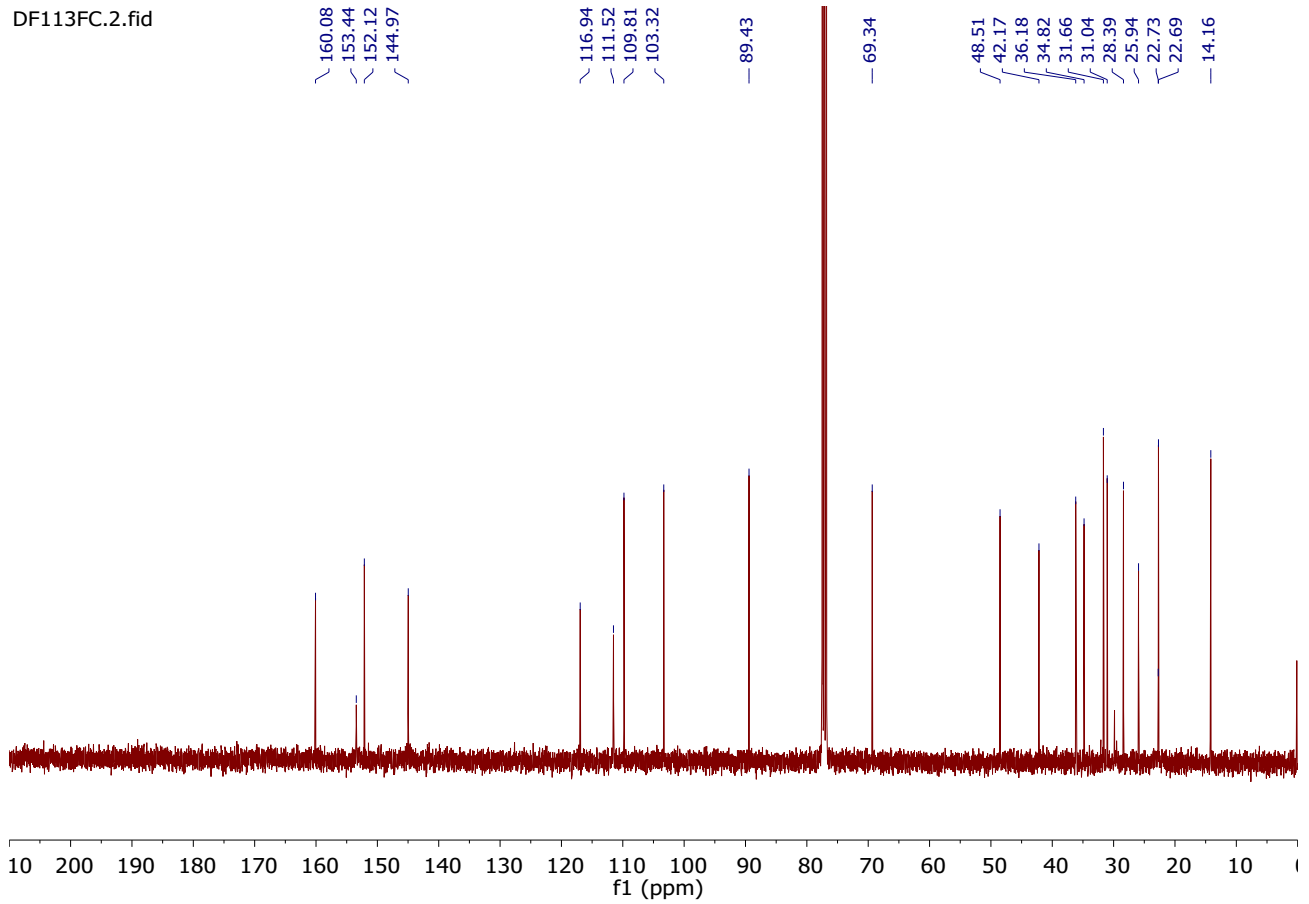

### GC-MS chromatograms and spectra

#### CBD (purified by column chromatography)

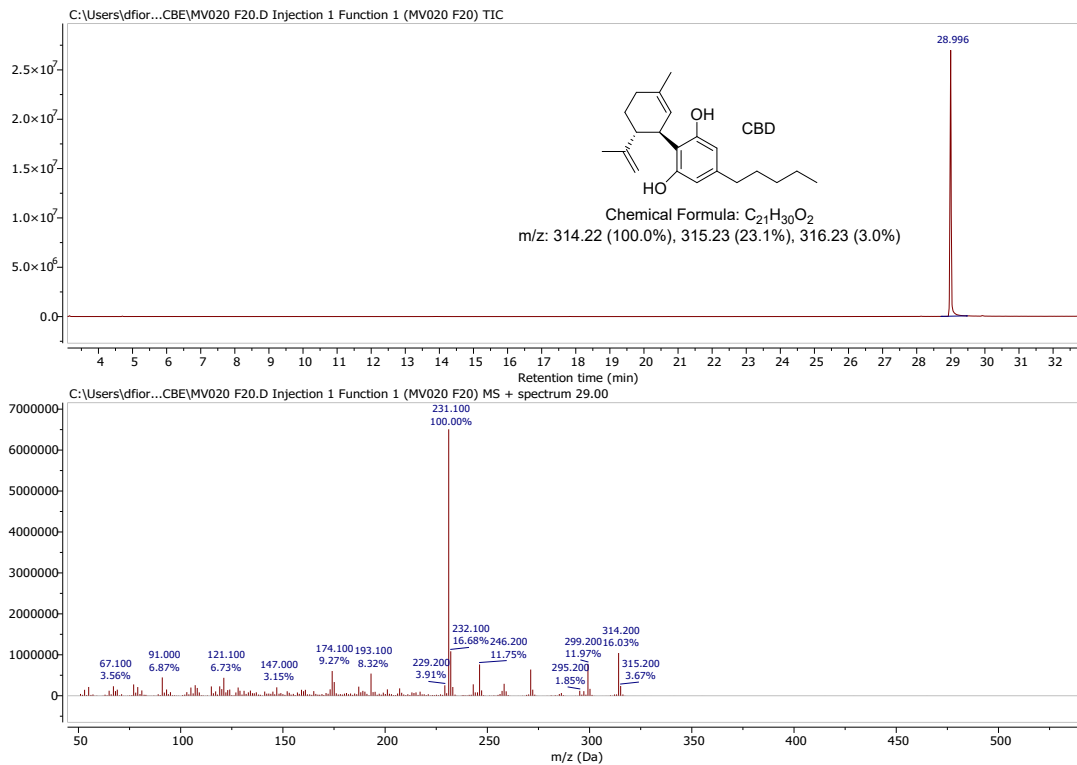

## CBD (purified by vacuum distillation)

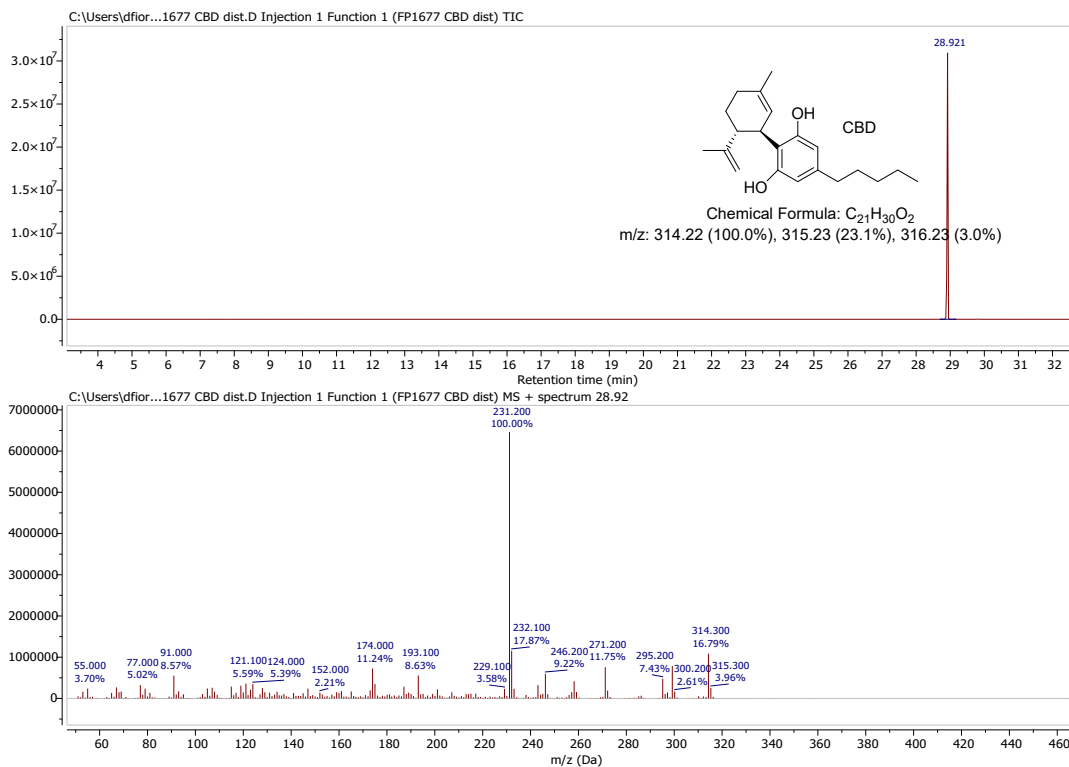

## CBD diacetate

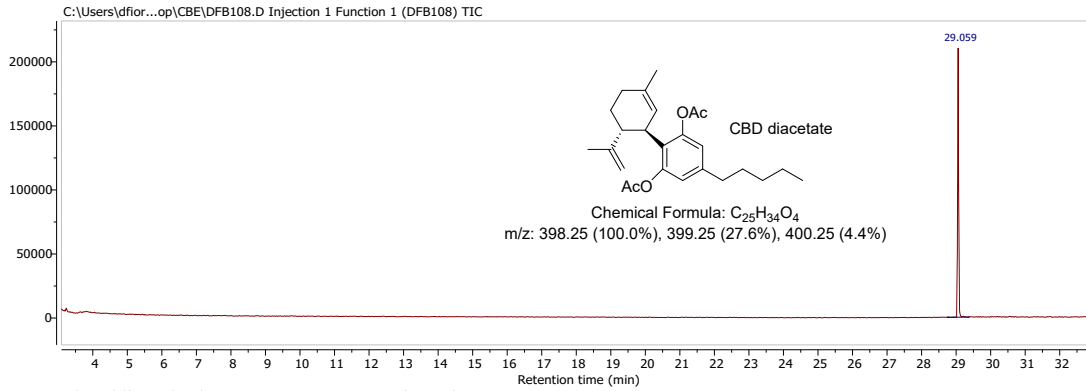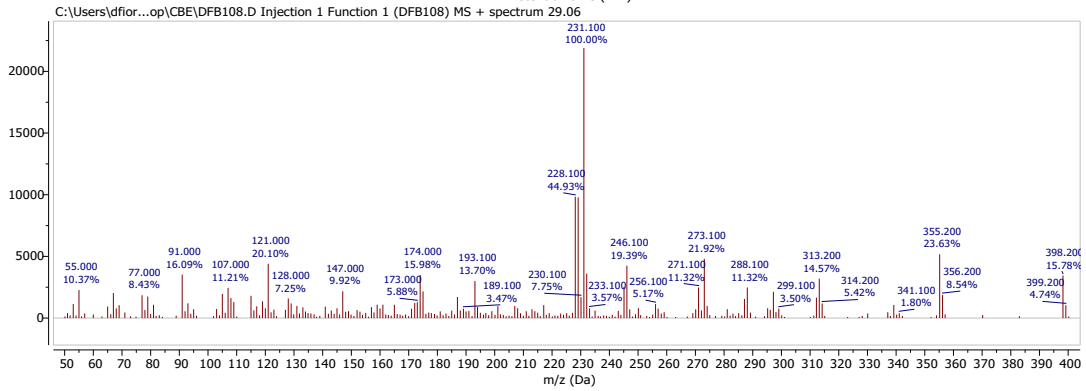

## CBDO diacetate

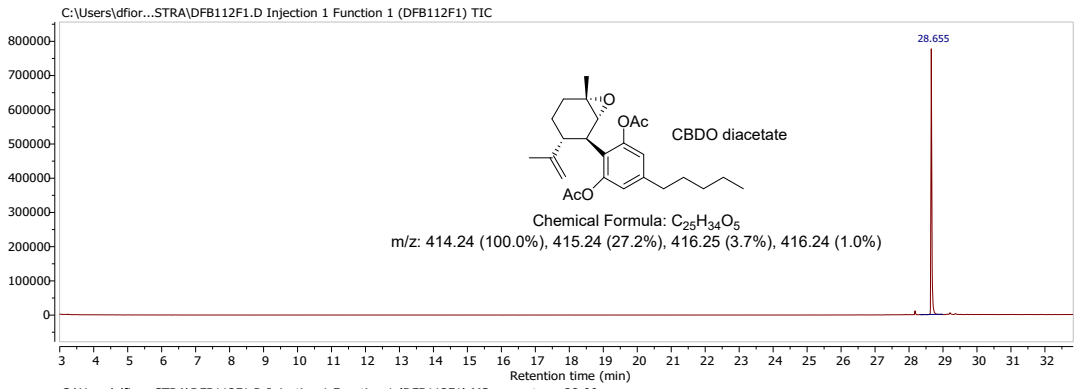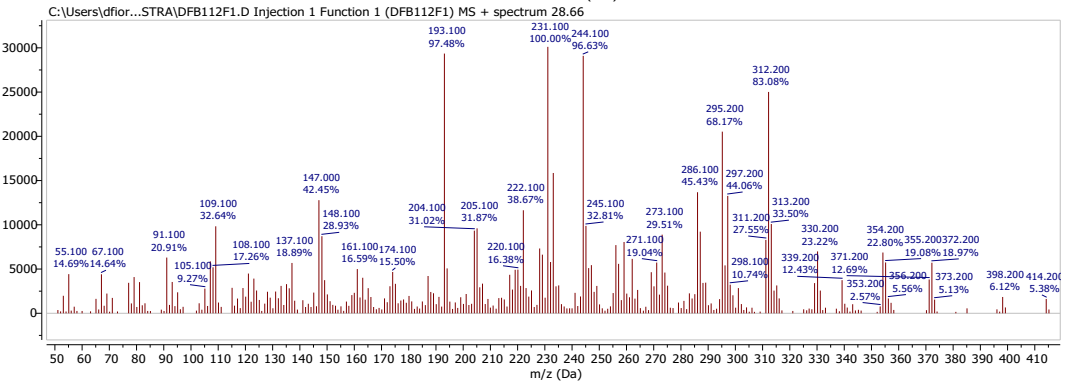



## CBE (chemo-enzymatic one-step)

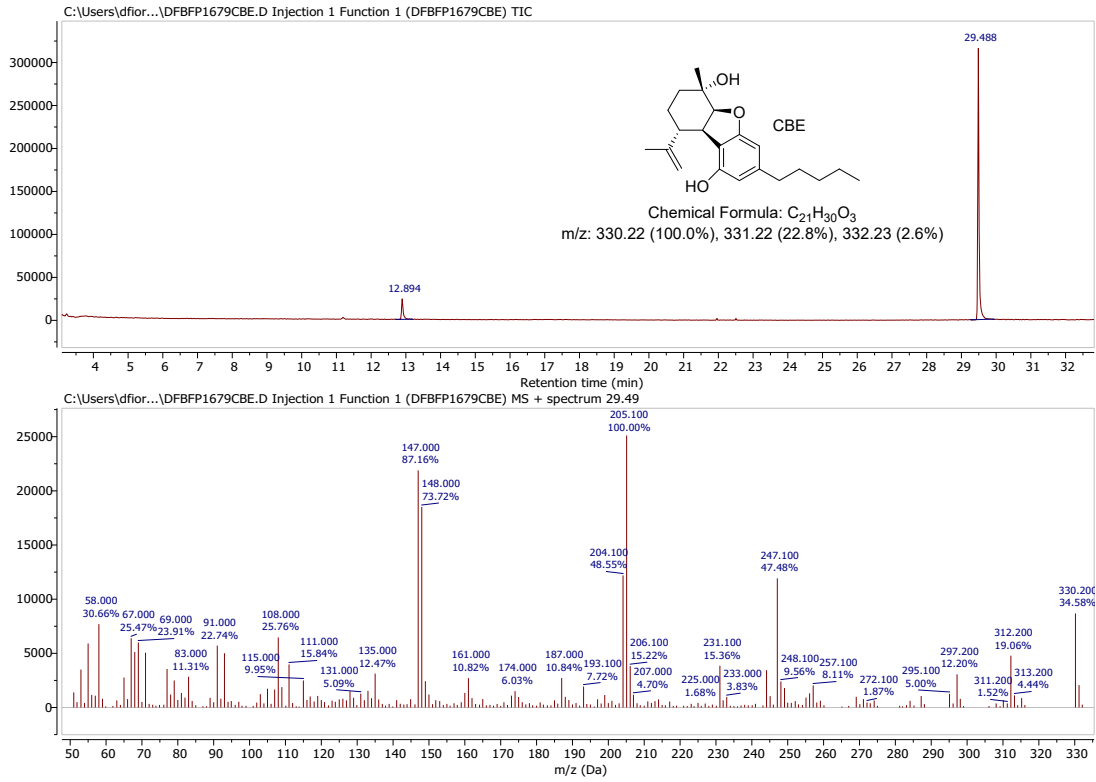

## CBE (chemo-enzymatic via CBD diacetate)

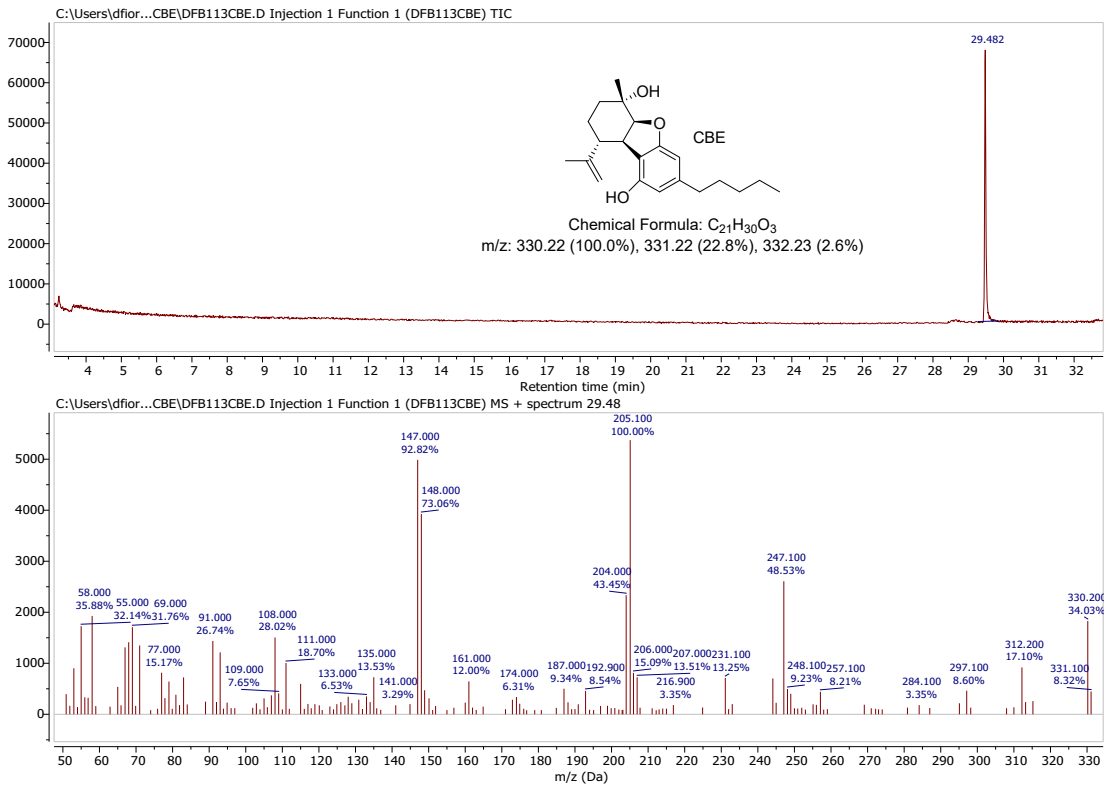

Supplement: d4gc00415a1.pdf [file d4gc00415a1.pdf]
